# Supplementary material for: Direct Amperometric Sensing of Fish Nodavirus RNA Using Gold Nanoparticle/DNA-Based Bioconjugates
Source: MDPI journal article supplement (doi:10.3390/pathogens10080932), 2021-07-23
Supplement: s1 [file s1]

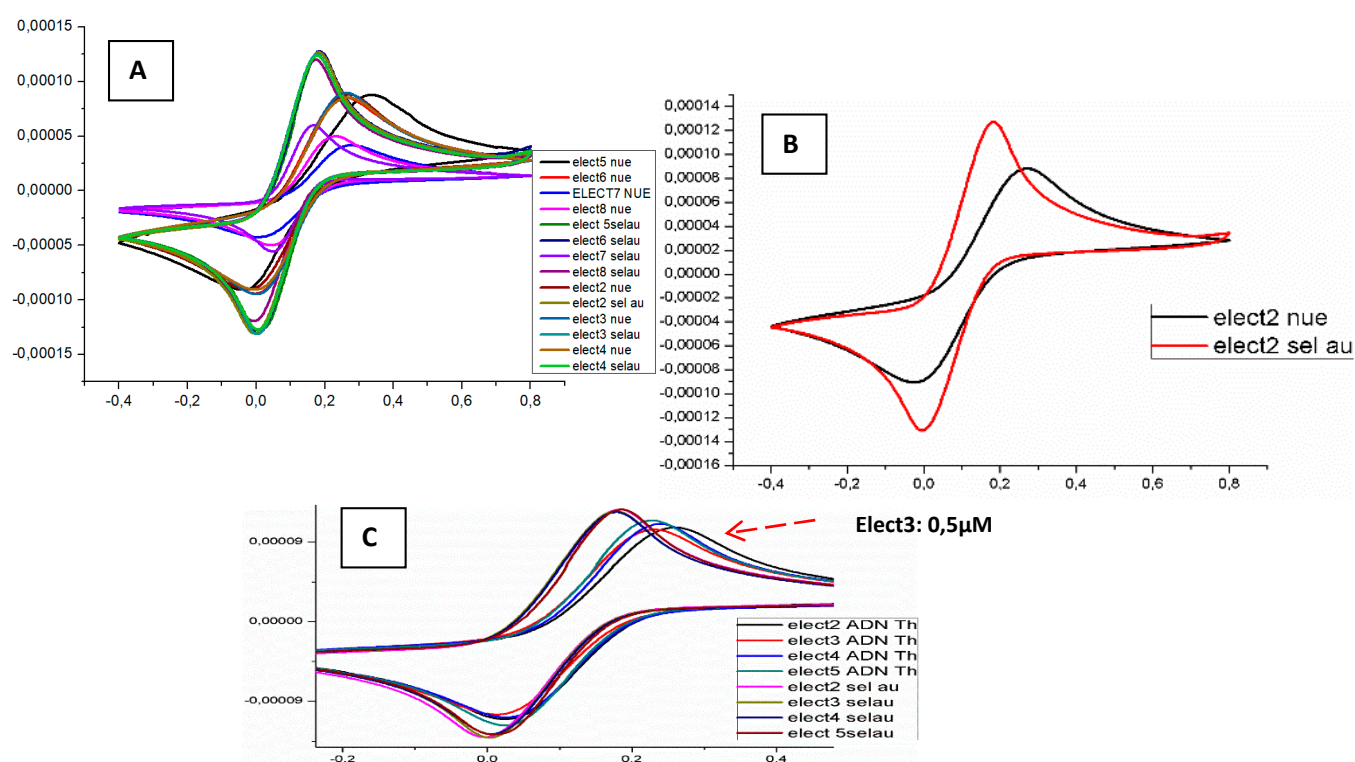

Figure 1. Optimization of parameters involved in the signal amplification. Optimization of (A) chronoamperometry curves for the gold nanoparticles electrodeposition at different concentrations, (B) the incubation time for AuNPs/SH DNA bioconjugates and (C) optimization of the SH-DNA probe concentrations.
